# Supplementary material
Source: publisher figshare collection journal article supplement (https://gsajournals.figshare.com/ndownloader/files/31136743)
Supplement: Supplementary file 1 [file 31136743]

Table S2. Fission yeast strains used in this study.

| Strain name | NBRP ID | Genotype |
| --- | --- | --- |
| DY44612 | FY33599 | *h− ura4-D18 ade6::ade6+-Padh15-skp1-AtTIR1-2NLS-9myc cdc20::cdc20-2HA-IAA17-ura4+* |
| DY44613 | FY33600 | *h− ura4-D18 ade6::ade6+-Padh15-skp1-AtTIR1-2NLS-9myc pol1::pol1-2HA-IAA17-ura4+* |
| DY44614 | FY33601 | *h− ura4-D18 ade6::ade6+-Padh15-skp1-AtTIR1-2NLS-9myc orc2::orc2-2HA-IAA17-ura4+* |
| DY44616 | FY33603 | *h− ura4-D18 ade6::ade6+-Padh15-skp1-AtTIR1-2NLS-9myc cdc45::cdc45-2HA-IAA17-ura4+* |
| DY8013 | FY21102 | *h− ura4-D18 ade6::ade6+-Padh15-skp1-AtTIR1-2NLS-9myc* |
| DY8014 | FY21103 | *h− ura4-D18 ade6::ade6+-Padh15-skp1-AtTIR1-2NLS-9myc mcm4::mcm4-2HA-IAA17-ura4+* |
| DY8015 | FY21104 | *h− ura4-D18 ade6::ade6+-Padh15-skp1-OsTIR1-natMX6-Padh15-skp1-AtTIR1-2NLS* |
| LD1 |  | *h− ura4-D18 leu1-32* |
| DY1672 |  | *h+ leu1-32 ade6-M216 ura4-D18* |
| DY38751 | FY39919 | *h+ mat1P∆17 leu1-32 lys1-131 ade6-M216 ura4-D18* |
| DY38753 | FY39920 | *h− mat1M∆17 leu1-32 lys1-131 ade6-M216 ura4-D18* |
| DY48525 | FY39921 | *h+ mat1P∆17 leu1-32 lys1-131 ade6-M216* |
| DY48568 | FY39922 | *h+ mat1P∆17 leu1-32 lys1-131 ade6-M216 ura4+::Padh1-OsTIR1* |
| DY48569 | FY39923 | *h+ mat1P∆17 leu1-32 lys1-131 ade6-M216 ura4+::Padh1-OsTIR1-F74A* |
| DY48567 | FY39924 | *h− mat1M∆17 leu1-32 lys1-131 ade6-M216* |
| DY48526 | FY39925 | *h− mat1M∆17 leu1-32 lys1-131 ade6-M216 ura4+::Padh1-OsTIR1* |
| DY48527 | FY39926 | *h− mat1M∆17 leu1-32 lys1-131 ade6-M216 ura4+::Padh1-OsTIR1-F74A* |
| DY48528 |  | *h+ mat1P∆17 leu1-32 lys1-131 ade6-M210 mcm4::mcm4-2HA-IAA17-ura4+* |
| DY48529 |  | *h+ mat1P∆17 leu1-32 lys1-131 ade6-M210 ura4+::Padh1-OsTIR1 mcm4::mcm4-2HA-IAA17-ura4+* |
| DY48530 |  | *h− leu1-32 ura4-D18 ade6::ade6+-Padh15-skp1-OsTIR1-natMX6-Padh15-skp1-AtTIR1-2NLS mcm4::mcm4-2HA-IAA17-ura4+* |
| DY48531 | FY39927 | *h+ mat1P∆17 leu1-32 lys1-131 ade6-M216 mcm4-3×sAID-kanMX* |
| DY48532 |  | *h− mat1M∆17 his3-D1 leu1-32 lys1-131 ade6-M216 ura4+::Padh1-OsTIR1 mcm4-3×sAID-kanMX* |
| DY48533 | FY39928 | *h+ mat1P∆17 leu1-32 lys1-131 ade6-M216 ura4+::Padh1-OsTIR1-F74A mcm4-3×sAID-kanMX* |
| DY48534 |  | *h+ mat1P∆17 leu1-32 lys1-131 ade6-M216 orc6-3×sAID-kanMX* |
| DY48535 |  | *h+ mat1P∆17 leu1-32 lys1-131 ade6-M216 ura4+::Padh1-OsTIR1-F74A orc6-3×sAID-kanMX* |
| DY48536 |  | *h+ mat1P∆17 leu1-32 lys1-131 ade6-M216 mcm10-3×sAID-kanMX* |
| DY48537 |  | *h+ mat1P∆17 leu1-32 lys1-131 ade6-M216 ura4+::Padh1-OsTIR1-F74A mcm10-3×sAID-kanMX* |
| DY48538 |  | *h+ mat1P∆17 leu1-32 lys1-131 ade6-M216 ssl3-3×sAID-kanMX* |
| DY48539 |  | *h+ mat1P∆17 leu1-32 lys1-131 ade6-M216 ura4+::Padh1-OsTIR1-F74A ssl3-3×sAID-kanMX* |
| DY48582 |  | *h+ his3-D1 leu1-32 ade6-M216 ura4-D18 cdc45-3×sAID-kanMX* |
| DY48583 |  | *h+ his3-D1 leu1-32 lys1-131 ade6-M216 ura4+::Padh1-OsTIR1-F74A cdc45-3×sAID-kanMX* |
| DY48584 |  | *h+ his3-D1 leu1-32 ade6-M216 ura4-D18 orc2-3×sAID-kanMX* |
| DY48585 |  | *h− his3-D1 leu1-32 lys1-131 ade6-M216 ura4+::Padh1-OsTIR1-F74A orc2-3×sAID-kanMX* |
| DY48544 |  | *h+ mat1P∆17 leu1-32 lys1-131 ade6-M216 ura4-D18 cdc45::cdc45-2HA-IAA17-ura4+* |
| DY48587 |  | *h− mat1M∆17 leu1-32 lys1-131 ade6-M216 ura4+::Padh1-OsTIR1 cdc45::cdc45-2HA-IAA17-ura4+* |
| DY48545 |  | *h+ mat1P∆17 leu1-32 lys1-131 ura4-D18 ade6::ade6+-Padh15-skp1-OsTIR1-natMX6-Padh15-skp1-AtTIR1-2NLS cdc45::cdc45-2HA-IAA17-ura4+* |
| DY48546 |  | *h+ mat1P∆17 leu1-32 lys1-131 ade6-M216 ura4-D18 orc2::orc2-2HA-IAA17-ura4+* |
| DY48547 |  | *h+ mat1P∆17 leu1-32 lys1-131 ade6-M216 ura4+::Padh1-OsTIR1 orc2::orc2-2HA-IAA17-ura4+* |
| DY48548 |  | *h+ mat1P∆17 leu1-32 lys1-131 ura4-D18 ade6::ade6+-Padh15-skp1-OsTIR1-natMX6-Padh15-skp1-AtTIR1-2NLS orc2::orc2-2HA-IAA17-ura4+* |
| DY48592 |  | *h+ mat1P∆17 leu1-32 lys1-131 ade6-M216 pol1-3×sAID-kanMX* |
| DY48593 |  | *h+ mat1P∆17 leu1-32 lys1-131 ade6-M216 ura4+::Padh1-OsTIR1 pol1-3×sAID-kanMX* |
| DY48594 |  | *h+ mat1P∆17 leu1-32 lys1-131 ade6-M216 ura4+::Padh1-OsTIR1-F74A pol1-3×sAID-kanMX* |
| DY48595 |  | *h+ mat1P∆17 leu1-32 lys1-131 ade6-M216 ura4-D18 pol1::pol1-2HA-IAA17-ura4+* |
| DY48596 |  | *h+ mat1P∆17 leu1-32 lys1-131 ade6-M216 ura4+::Padh1-OsTIR1 pol1::pol1-2HA-IAA17-ura4+* |
| DY48597 |  | *h+ mat1P∆17 leu1-32 lys1-131 ade6-M216 ura4+::Padh1-OsTIR1-F74A pol1::pol1-2HA-IAA17-ura4+* |
| DY48555 |  | *h+ mat1P∆17 leu1-32 lys1-131 ade6-M216 cdc20-3×sAID-kanMX* |
| DY48556 |  | *h+ mat1P∆17 leu1-32 lys1-131 ade6-M216 ura4+::Padh1-OsTIR1 cdc20-3×sAID-kanMX* |
| DY48557 |  | *h+ mat1P∆17 leu1-32 lys1-131 ade6-M216 ura4+::Padh1-OsTIR1-F74A cdc20-3×sAID-kanMX* |
| DY48558 |  | *h+ mat1P∆17 leu1-32 lys1-131 ade6-M216 ura4-D18 cdc20::cdc20-2HA-IAA17-ura4+* |
| DY48559 |  | *h+ mat1P∆17 leu1-32 lys1-131 ade6-M216 ura4+::Padh1-OsTIR1 cdc20::cdc20-2HA-IAA17-ura4+* |
| DY48560 |  | *h+ mat1P∆17 leu1-32 lys1-131 ade6-M216 ura4+::Padh1-OsTIR1-F74A cdc20::cdc20-2HA-IAA17-ura4+* |
| DY48561 |  | *h+ mat1P∆17 leu1-32 lys1-131 ade6-M216 ura4-D18 sec8-3×sAID-kanMX* |
| DY48562 |  | *h+ mat1P∆17 leu1-32 lys1-131 ade6-M216 ura4+::Padh1-OsTIR1-F74A sec8-3×sAID-kanMX* |
| DY48563 |  | *h+ mat1P∆17 leu1-32 lys1-131 ade6-M216 ura4-D18 sec16-3×sAID-kanMX* |
| DY48564 |  | *h+ mat1P∆17 leu1-32 lys1-131 ade6-M216 ura4+::Padh1-OsTIR1-F74A sec16-3×sAID-kanMX* |
| DY48565 |  | *h+ mat1P∆17 his3-D1 leu1-32 ade6-M216 ura4-D18 mcm4-3×sAID-kanMX* |
| DY48566 |  | *h+ mat1P∆17 his3-D1 leu1-32 lys1-131 ade6-M216 ura4+::Padh1-OsTIR1-F74A mcm4-3×sAID-kanMX* |
